# Supplementary material for: DRIMust: a web server for discovering rank imbalanced motifs using suffix trees
Source: Oxford University Press journal article supplement (doi:10.1093/nar/gkt407), 2013-05-17
Supplement: gkt407_Supplementary_Data.zip [file gkt407_Supplementary_Data.zip]

## Supplementary Table 1 – Comparison between DRIMUST and three other tools on various DNA and RNA examples

To evaluate the performance of DRIMust in comparison to other state-of-the-art methods we ran DRIMust on 24 examples generated from high throughput binding experiments on 10 transcription factors and 14 RNA-binding proteins and compared the results to those obtained by using four other methods: the standard MEME program, the DREME program, XXmotif and SCOPE. Almost all the input examples comprised ranked lists, except for p53 which comprised target and background sets. Since MEME, DREME, XXmotif and SCOPE expect a target set as input, we converted the ranked lists into target sets by taking the top 100 sequences in the case of MEME (restricted by MEME's limitation of 60,000 characters) and the top 20% sequences for the other tools.

|     | The protein and its consensus binding motif                                                                                                         | DRIMust results                                                                                                                                                                                                         | MEME results                                                                                                                                               | DREME results                                                                                                                                                    | XXmotif results                                                                                                                                               | SCOPE results                                                                                                                                                                                                                                                                                                                                                |
|-----|-----------------------------------------------------------------------------------------------------------------------------------------------------|-------------------------------------------------------------------------------------------------------------------------------------------------------------------------------------------------------------------------|------------------------------------------------------------------------------------------------------------------------------------------------------------|------------------------------------------------------------------------------------------------------------------------------------------------------------------|---------------------------------------------------------------------------------------------------------------------------------------------------------------|--------------------------------------------------------------------------------------------------------------------------------------------------------------------------------------------------------------------------------------------------------------------------------------------------------------------------------------------------------------|
| DNA | <b>p53</b><br>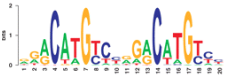<br>Consensus motif and data were taken from (1)     | P-value $\leq 2.22\text{e-}266$<br><br><br>3092 sequences (half targets and half background);<br>1,267,720 characters;<br>0.76 minutes | 1.8e-100<br><br><br>100 sequences;<br>41,000 characters;<br>28.26 minutes | 4.9e-133<br><br><br>1546 sequences;<br>633,852 characters;<br>35.66 minutes   | 1e-490<br><br><br>1546 sequences;<br>633,852 characters;<br>46 minutes     | 1e-321<br><br>1e-320<br><br>1e-318<br><br>1546 sequences;<br>633,852 characters;<br>9 hours        |
|     | <b>hoxa2</b><br><br>Consensus motif and data were taken from (2) | P-value $\leq 1.70\text{e-}80$<br><br><br>8245 sequences;<br>1,649,000 characters;<br>1.07 minutes                                   | 1.6e-81<br><br><br>100 sequences;<br>20,000 characters;<br>7.61 minutes | 3.0e-120<br><br><br>1649 sequences;<br>329,800 characters;<br>13.83 minutes | 6.68e-167<br><br><br>1649 sequences;<br>329,800 characters<br>13 minutes | 1e-377<br><br>1e-341<br><br>1e-331<br><br>1649 sequences;<br>329,800 characters;<br>6.1 hours |

|                                                                                                     |                                                                                                                                                                                                         |                                                                                                                                                                                                                                                                                    |                                                                                                                                                                                                                                                                                         |                                                                                                                                                                                                                                                                                         |                                                                                                                                                                                                                                                                                |
|-----------------------------------------------------------------------------------------------------|---------------------------------------------------------------------------------------------------------------------------------------------------------------------------------------------------------|------------------------------------------------------------------------------------------------------------------------------------------------------------------------------------------------------------------------------------------------------------------------------------|-----------------------------------------------------------------------------------------------------------------------------------------------------------------------------------------------------------------------------------------------------------------------------------------|-----------------------------------------------------------------------------------------------------------------------------------------------------------------------------------------------------------------------------------------------------------------------------------------|--------------------------------------------------------------------------------------------------------------------------------------------------------------------------------------------------------------------------------------------------------------------------------|
| <p><b>REB1</b><br/> <b>TTACCCG</b><br/> Consensus motif was taken from (3) and data from (4)</p>    | <p>P-value <math>\leq 2.47\text{e-}131</math></p> 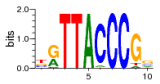 <p>4000 sequences;<br/> 2,000,000 characters;<br/> 1.26 minutes</p> | <p>7.0e-113</p>  <p>100 sequences;<br/> 50,000 characters;<br/> 39.77 minutes</p>                                                                                                                 | <p>1.1e-80</p>  <p>800 sequences;<br/> 400,000 characters;<br/> 15.58 minutes</p>                                                                                                                    | <p>3.15e-89</p>  <p>800 sequences;<br/> 400,000 characters;<br/> 14 minutes</p>                                                                                                                      | <p>1e-321</p>  <p>1e-280 (fifth best)</p>  <p>800 sequences;<br/> 400,000 characters;<br/> 5.9 hours</p> |
| <p><b>CBF1</b><br/> <b>tCACGTG</b><br/> Consensus motif was taken from (3) and data from (4)</p>    | <p>P-value <math>\leq 1.03\text{e-}89</math></p>  <p>4000 sequences;<br/> 2,000,000 characters;<br/> 1.2 minutes</p>   | <p>2.3e-100</p>  <p>9.1e-070 (second best)</p>  <p>100 sequences;<br/> 50,000 characters;<br/> 43.3 minutes</p> | <p>1.1e-39</p>  <p>2.0e-023 (forth best)</p>  <p>800 sequences;<br/> 400,000 characters;<br/> 29.48 minutes</p>   | <p>5.00e-15</p>  <p>2.72e-10 (third best)</p>  <p>800 sequences;<br/> 400,000 characters;<br/> 11 minutes</p>     | <p>1e-321</p>  <p>800 sequences;<br/> 400,000 characters;<br/> 5.7 hours</p>                                                                                                                |
| <p><b>UME6</b><br/> <b>taGCCGCCsa</b><br/> Consensus motif was taken from (3) and data from (4)</p> | <p>P-value <math>\leq 2.18\text{e-}102</math></p>  <p>4000 sequences;<br/> 2,000,000 characters;<br/> 1.25 minutes</p> | <p>2.0e-114</p>  <p>100 sequences;<br/> 50,000 characters;<br/> 41 minutes</p>                                                                                                                    | <p>3.1e-45</p>  <p>5.1e-030 (third best)</p>  <p>800 sequences;<br/> 400,000 characters;<br/> 23.16 minutes</p>   | <p>3.52e-47</p>  <p>800 sequences;<br/> 400,000 characters;<br/> 13 minutes</p>                                                                                                                      | <p>1e-321</p>  <p>800 sequences;<br/> 400,000 characters;<br/> 5.7 hours</p>                                                                                                                |
| <p><b>TYE7</b><br/> <b>tCACGTGa</b><br/> Consensus motif was taken from (3) and data from (4)</p>   | <p>P-value <math>\leq 3.31\text{e-}62</math></p>  <p>4000 sequences;<br/> 2,000,000 characters;<br/> 1.2 minutes</p> | <p>7.9e-115</p>  <p>100 sequences;<br/> 50,000 characters;<br/> 42.5 minutes</p>                                                                                                               | <p>7.3e-43</p>  <p>1.7e-018 (fourth best)</p>  <p>800 sequences;<br/> 400,000 characters;<br/> 29 minutes</p> | <p>9.26e-21</p>  <p>1.11e-10 (third best)</p>  <p>800 sequences;<br/> 400,000 characters;<br/> 22 minutes</p> | <p>1e-321</p>  <p>800 sequences;<br/> 400,000 characters;<br/> 5.7 hours</p>                                                                                                              |

|                                                                                                         |                                                                                                                                                                                                          |                                                                                                                                                                    |                                                                                                                                                                                                                                                                                        |                                                                                                                                                                                                                                                                                      |                                                                                                                                                                                                                                                                                    |
|---------------------------------------------------------------------------------------------------------|----------------------------------------------------------------------------------------------------------------------------------------------------------------------------------------------------------|--------------------------------------------------------------------------------------------------------------------------------------------------------------------|----------------------------------------------------------------------------------------------------------------------------------------------------------------------------------------------------------------------------------------------------------------------------------------|--------------------------------------------------------------------------------------------------------------------------------------------------------------------------------------------------------------------------------------------------------------------------------------|------------------------------------------------------------------------------------------------------------------------------------------------------------------------------------------------------------------------------------------------------------------------------------|
| <p><b>GCN4</b><br/> <b>TGA</b><b>STCa</b><br/> Consensus motif was taken from (3) and data from (4)</p> | <p>P-value <math>\leq 2.37\text{e-}42</math></p> 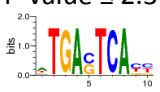 <p>4000 sequences;<br/> 2,000,000 characters;<br/> 1.09 minutes</p>   | <p>1.3e-85</p>  <p>100 sequences;<br/> 50,000 characters;<br/> 43.15 minutes</p> | <p>2.0e-32</p>  <p>2.5e-005 (ninth best)</p>  <p>800 sequences;<br/> 400,000 characters;<br/> 20.57 minutes</p>  | <p>4.00e-17</p>  <p>800 sequences;<br/> 400,000 characters;<br/> 14 minutes</p>                                                                                                                   | <p>1e-321</p>  <p>800 sequences;<br/> 400,000 characters;<br/> 5.6 hours</p>                                                                                                                    |
| <p><b>INO2</b><br/> <b>CACaTGc</b><br/> Consensus motif was taken from (3) and data from (4)</p>        | <p>P-value <math>\leq 1.14\text{e-}37</math></p>  <p>4000 sequences;<br/> 2,000,000 characters;<br/> 1.1 minutes</p>    | <p>3.1e-88</p>  <p>100 sequences;<br/> 50,000 characters;<br/> 40.72 minutes</p> | <p>1.1e-42</p>  <p>2.2e-007 (eighth best)</p>  <p>800 sequences;<br/> 400,000 characters;<br/> 21.93 minutes</p> | <p>2.68e-17</p>  <p>800 sequences;<br/> 400,000 characters;<br/> 12 minutes</p>                                                                                                                   | <p>1e-321</p>  <p>800 sequences;<br/> 400,000 characters;<br/> 5.6 hours</p>                                                                                                                    |
| <p><b>MBP1</b><br/> <b>ACGCGt</b><br/> Consensus motif was taken from (3) and data from (4)</p>         | <p>P-value <math>\leq 1.17\text{e-}47</math></p>  <p>4000 sequences;<br/> 2,000,000 characters;<br/> 1.2 minutes</p>    | <p>7.9e-97</p>  <p>100 sequences;<br/> 50,000 characters;<br/> 39.78 minutes</p> | <p>5.4e-47</p>  <p>7.6e-009 (sixth best)</p>  <p>800 sequences;<br/> 400,000 characters;<br/> 23.67 minutes</p> | <p>1.01e-23</p>  <p>1.31e-06 (forth best)</p>  <p>800 sequences;<br/> 400,000 characters;<br/> 20 minutes</p> | <p>1e-321</p>  <p>800 sequences;<br/> 400,000 characters;<br/> 5.6 hours</p>                                                                                                                    |
| <p><b>SWI4</b><br/> <b>CgC</b><b>AAAA</b><br/> Consensus motif was taken from (3) and data from (4)</p> | <p>P-value <math>\leq 2.97\text{e-}33</math></p>  <p>4000 sequences;<br/> 2,000,000 characters;<br/> 1.22 minutes</p> | <p>8.3e-120</p>  <p>100 sequences;<br/> 50,000 characters;<br/> 40 minutes</p> | <p>2.3e-47</p>  <p>800 sequences;<br/> 400,000 characters;<br/> 23.62 minutes</p>                                                                                                                 | <p>2.91e-20</p>  <p>800 sequences;<br/> 400,000 characters;<br/> 13 minutes</p>                                                                                                                 | <p>1e-321</p>  <p>1e-320 (third best)</p>  <p>800 sequences;<br/> 400,000 characters;<br/> 5.6 hours</p> |

|     |                                                                                                                                                                  |                                                                                                                                                                                                      |                                                                                                                                                                   |                                                                                                                                                                                                                                                                                      |                                                                                                                                                                                                                                                                                   |                                                                                                                                                                                                                                                                                   |
|-----|------------------------------------------------------------------------------------------------------------------------------------------------------------------|------------------------------------------------------------------------------------------------------------------------------------------------------------------------------------------------------|-------------------------------------------------------------------------------------------------------------------------------------------------------------------|--------------------------------------------------------------------------------------------------------------------------------------------------------------------------------------------------------------------------------------------------------------------------------------|-----------------------------------------------------------------------------------------------------------------------------------------------------------------------------------------------------------------------------------------------------------------------------------|-----------------------------------------------------------------------------------------------------------------------------------------------------------------------------------------------------------------------------------------------------------------------------------|
| RNA | <p><b>puf2</b></p>  <p>Consensus motif was taken from (5) and data from (6)</p> | <p>P-value <math>\leq 4.93\text{e-}51</math></p>  <p>4937 sequences;<br/>636,234 characters;<br/>0.51 minutes</p>   | <p>3.2e-8</p>  <p>100 sequences;<br/>16,991 characters;<br/>2.92 minutes</p>    | <p>7.8e-34</p>  <p>8.0e-006 (third best)</p>  <p>988 sequences;<br/>139,903 characters;<br/>1.9 minutes</p>    | <p>8.94e-25</p>  <p>2.23e-16 (second best)</p>  <p>988 sequences;<br/>139,903 characters;<br/>9 minutes</p> | <p>6.3e-322</p>  <p>6.7e-166</p>  <p>988 sequences;<br/>139,903 characters;<br/>2 minutes</p>               |
|     | <p><b>puf3</b></p>  <p>Consensus motif and data were taken from (6)</p>         | <p>P-value <math>\leq 9.44\text{e-}153</math></p>  <p>4970 sequences;<br/>640,926 characters;<br/>0.39 minutes</p>  | <p>6.2e-151</p>  <p>100 sequences;<br/>11,304 characters;<br/>1.45 minutes</p>   | <p>7.4e-75</p>  <p>1007 sequences;<br/>132,972 characters;<br/>1.6 minutes</p>                                                                                                                    | <p>9.05e-65</p>  <p>1007 sequences;<br/>132,972 characters;<br/>7 minutes</p>                                                                                                                  | <p>2.5e-321</p>  <p>8.7e-170 (third best)</p>  <p>1007 sequences;<br/>132,972 characters;<br/>2 minutes</p> |
|     | <p><b>puf4</b></p>  <p>Consensus motif and data were taken from (6)</p>         | <p>P-value <math>\leq 5.22\text{e-}123</math></p>  <p>4948 sequences;<br/>638,135 characters<br/>0.49 minutes</p>   | <p>9.0e-50</p>  <p>100 sequences;<br/>14,252 characters;<br/>2.16 minutes</p>    | <p>4.3e-51</p>  <p>4.4e-019 (second best)</p>  <p>1002 sequences;<br/>129,950 characters;<br/>1.58 minutes</p> | <p>8.90e-20</p>  <p>1002 sequences;<br/>129,950 characters;<br/>8 minutes</p>                                                                                                                  | <p>9.6e-322</p>  <p>6.7e-175</p>  <p>1002 sequences;<br/>129,950 characters;<br/>2 minutes</p>              |
|     | <p><b>PUM2</b></p>  <p>Consensus motif and data were taken from (7)</p>       | <p>P-value <math>\leq 4.9\text{e-}324</math></p>  <p>9995 sequences;<br/>999,500 characters;<br/>1.35 minutes</p> | <p>2.0e-101</p>  <p>100 sequences;<br/>10,000 characters;<br/>1.25 minutes</p> | <p>2.3e-106</p>  <p>1999 sequences;<br/>199,900 characters;<br/>3.43 minutes</p>                                                                                                                | <p>4.10e-148</p>  <p>1999 sequences;<br/>199,900 characters;<br/>20 minutes</p>                                                                                                              | <p>5.5e-400</p>  <p>2e-398</p>  <p>1999 sequences;<br/>199,900 characters;<br/>3 minutes</p>            |

|                                                                                                                                                            |                                                                                                                                                                                                     |                                                                                                                                                                                                                                                                 |                                                                                                                                                                                                                                                                       |                                                                                                                                                                                                                                                                                |                                                                                                                                                                                                                                                                       |
|------------------------------------------------------------------------------------------------------------------------------------------------------------|-----------------------------------------------------------------------------------------------------------------------------------------------------------------------------------------------------|-----------------------------------------------------------------------------------------------------------------------------------------------------------------------------------------------------------------------------------------------------------------|-----------------------------------------------------------------------------------------------------------------------------------------------------------------------------------------------------------------------------------------------------------------------|--------------------------------------------------------------------------------------------------------------------------------------------------------------------------------------------------------------------------------------------------------------------------------|-----------------------------------------------------------------------------------------------------------------------------------------------------------------------------------------------------------------------------------------------------------------------|
| <p><b>QKI</b></p>  <p>Consensus motif and data were taken from (7)</p>    | <p>P-value <math>\leq 4.9\text{e-}324</math></p>  <p>9997 sequences;<br/>999,700 characters;<br/>1.09 minutes</p>  | <p>2.0e-19</p>  <p>100 sequences;<br/>10,000 characters;<br/>1.17 minutes</p>                                                                                                 | <p>9.8e-51</p>  <p>2000 sequences;<br/>200,000 characters;<br/>3.03 minutes</p>                                                                                                    | <p>2.55e-45</p>  <p>2000 sequences;<br/>200,000 characters;<br/>25 minutes</p>                                                                                                              | <p>4.2e-400</p>  <p>2.5e-356</p>  <p>2000 sequences;<br/>200,000 characters;<br/>10.6 hours</p> |
| <p><b>Puf5</b></p>  <p>Consensus motif and data were taken from (8)</p>   | <p>P-value <math>\leq 3.47\text{e-}78</math></p>  <p>4795 sequences;<br/>622,010 characters;<br/>0.43 minutes</p>  | <p>3.6e-9</p>  <p>3.1e-004</p>  <p>100 sequences;<br/>15,234 characters;<br/>2.52 minutes</p> | <p>6.8e-42</p>  <p>3.1e-012</p>  <p>959 sequences;<br/>134,166 characters;<br/>1.53 minutes</p> | <p>9.76e-21</p>  <p>1.61e-20</p>  <p>959 sequences;<br/>134,166 characters;<br/>10 minutes</p>           | <p>3.8e-321</p>  <p>4.2e-150</p>  <p>959 sequences;<br/>134,166 characters;<br/>3 minutes</p>   |
| <p><b>Pub1</b></p>  <p>Consensus motif and data were taken from (8)</p>   | <p>P-value <math>\leq 6.94\text{e-}177</math></p>  <p>4251 sequences;<br/>548,258 characters;<br/>1.03 minutes</p> | <p>7.5e-8</p>  <p>100 sequences;<br/>17,020 characters;<br/>2.88 minutes</p>                                                                                                  | <p>2.1e-36</p>  <p>2.4e-016</p>  <p>851 sequences;<br/>133,915 characters;<br/>1.33 minutes</p> | <p>5.73e-18</p>  <p>2.48e-05 (4th best)</p>  <p>851 sequences;<br/>133,915 characters;<br/>9 minutes</p> | <p>1.9e-203</p>  <p>4.3e-146</p>  <p>851 sequences;<br/>133,915 characters;<br/>2 minutes</p>   |
| <p><b>Pab1</b></p>  <p>Consensus motif and data were taken from (8)</p> | <p>No motif was found</p> <p>4142 sequences;<br/>534,415 characters;<br/>0.23 minutes</p>                                                                                                           | <p>8.0e-30</p>  <p>100 sequences;<br/>12,734 characters;<br/>1.96 minutes</p>                                                                                               | <p>5.4e-45</p>  <p>829 sequences;<br/>99,365 characters;<br/>1.33 minutes</p>                                                                                                    | <p>5.89e-28</p>  <p>829 sequences;<br/>99,365 characters;<br/>17 minutes</p>                                                                                                              | <p>7.8e-322</p>  <p>829 sequences;<br/>99,365 characters;<br/>8.4 hours</p>                                                                                                      |



|                                                                                                                                                    |                                                                                                                                                                                 |                                                                                                                                                        |                                                                                                                                                                                                                                                                             |                                                                                                                                                                                                                                                          |                                                                                                                                                                                                                                                          |
|----------------------------------------------------------------------------------------------------------------------------------------------------|---------------------------------------------------------------------------------------------------------------------------------------------------------------------------------|--------------------------------------------------------------------------------------------------------------------------------------------------------|-----------------------------------------------------------------------------------------------------------------------------------------------------------------------------------------------------------------------------------------------------------------------------|----------------------------------------------------------------------------------------------------------------------------------------------------------------------------------------------------------------------------------------------------------|----------------------------------------------------------------------------------------------------------------------------------------------------------------------------------------------------------------------------------------------------------|
| <b>Khd1</b><br><br>Consensus motif and data were taken from (8)   | P-value $\leq 1.39\text{e-}16$<br><br>4773 sequences;<br>619,178 characters;<br>0.35 minutes   | 2.1e-12<br><br>100 sequences;<br>16,243 characters;<br>2.83 minutes  | 1.2e-45<br><br>955 sequences;<br>137,956 characters;<br>1.28 minutes                                                                                                                     | 1.24e-26<br><br>955 sequences;<br>137,956 characters;<br>9 minutes                                                                                                    | 1.6e-320<br><br>7.6e-147<br><br>955 sequences;<br>137,956 characters;<br>8.4 hours |
| <b>Nab2</b><br><br>Consensus motif and data were taken from (8)   | P-value $\leq 4.80\text{e-}15$<br><br>4101 sequences;<br>528,461 characters;<br>0.29 minutes   | 1.9e-13<br><br>100 sequences;<br>11,514 characters;<br>1.67 minutes   | 1.0e-39<br><br>2.2e-008<br><br>821 sequences;<br>111,334 characters;<br>1.58 minutes                  | 8.16e-29<br><br>4.16e-9<br><br>821 sequences;<br>111,334 characters;<br>10 minutes | 1.4e-140<br><br>821 sequences;<br>111,334 characters;<br>3 minutes                                                                                                    |
| <b>Vts1</b><br><br>Consensus motif and data were taken from (8)   | No motif was found<br>1787 sequences;<br>234,740 characters;<br>0.09 minutes                                                                                                    | 4.5e-5<br><br>100 sequences;<br>13,720 characters;<br>2.23 minutes   | 1.0e-14<br><br>358 sequences;<br>45,130 characters;<br>0.38 minutes                                                                                                                      | 1.08e-8<br><br>358 sequences;<br>45,130 characters;<br>7 minutes                                                                                                      | 2.1e-75<br><br>358 sequences;<br>45,130 characters;<br>2 minutes                                                                                                      |
| <b>Pin4</b><br><br>Consensus motif and data were taken from (8) | P-value $\leq 3.72\text{e-}9$<br><br>4261 sequences;<br>549,860 characters;<br>0.25 minutes  | 1.3<br><br>100 sequences;<br>12,003 characters;<br>1.76 minutes     | 3.1e-51<br><br>853 sequences;<br>109,847 characters;<br>1.04 minutes                                                                                                                   | 1.65e-28<br><br>853 sequences;<br>109,847 characters;<br>11 minutes                                                                                                 | 2.2e-167<br><br>853 sequences;<br>109,847 characters;<br>7.5 hours                                                                                                  |
| <b>Nrd1</b><br><br>Consensus motif and data were taken from (8) | P-value $\leq 6.69\text{e-}13$<br><br>3947 sequences;<br>507,022 characters;<br>0.24 minutes | 6.6e-8<br><br>100 sequences;<br>14,906 characters;<br>2.48 minutes | 4.1e-44<br><br>1.1e-004 (third best)<br><br>790 sequences;<br>104,759 characters;<br>1.28 minutes | 4.15e-20<br><br>790 sequences;<br>104,759 characters;<br>10 minutes                                                                                                 | 2.2e-143<br><br>790 sequences;<br>104,759 characters;<br>7.5 hours                                                                                                  |

|                                                                                                                                                     |                                                                                                                                                                       |                                                                                                                                                       |                                                                                                                                                        |                                                                                                                                                      |                                                                                                                                                     |
|-----------------------------------------------------------------------------------------------------------------------------------------------------|-----------------------------------------------------------------------------------------------------------------------------------------------------------------------|-------------------------------------------------------------------------------------------------------------------------------------------------------|--------------------------------------------------------------------------------------------------------------------------------------------------------|------------------------------------------------------------------------------------------------------------------------------------------------------|-----------------------------------------------------------------------------------------------------------------------------------------------------|
| <b>YLL032C</b><br><br>Consensus motif and data were taken from (8) | P-value $\leq 5.84e-7$<br><br>2286 sequences;<br>295,474 characters;<br>0.11 minutes | 2.3e-11<br><br>100 sequences;<br>14,249 characters;<br>2.38 minutes | 3.4e-24<br><br>458 sequences;<br>58,789 characters;<br>0.48 minutes | 9.54e-14<br><br>458 sequences;<br>58,789 characters;<br>8 minutes | 4.6e-69<br><br>458 sequences;<br>58,789 characters;<br>7.4 hours |
|-----------------------------------------------------------------------------------------------------------------------------------------------------|-----------------------------------------------------------------------------------------------------------------------------------------------------------------------|-------------------------------------------------------------------------------------------------------------------------------------------------------|--------------------------------------------------------------------------------------------------------------------------------------------------------|------------------------------------------------------------------------------------------------------------------------------------------------------|-----------------------------------------------------------------------------------------------------------------------------------------------------|

## References

1. Smeenk, L., van Heeringen, S.J., Koeppe, M., van Driel, M.A., Bartels, S.J.J., Akkers, R.C., Denissov, S., Stunnenberg, H.G. and Lohrum, M. (2008) Characterization of genome-wide p53-binding sites upon stress response. *Nucleic Acids Research*, **36**, 3639-3654. doi: 10.1093/nar/gkn232  
<http://www.ncbi.nlm.nih.gov/pmc/articles/PMC2441782/>
2. Donaldson, I.J., Amin, S., Hensman, J.J., Kutejova, E., Ratray, M., Lawrence, N., Hayes, A., Ward, C.M. and Bobola, N. (2012) Genome-wide occupancy links Hoxa2 to Wnt- $\beta$ -catenin signaling in mouse embryonic development. *Nucleic Acids Research*, **40**, 3990-4001. doi: 10.1093/nar/gkr1240  
<http://www.ncbi.nlm.nih.gov/pmc/articles/PMC3351182/>
3. Harbison, C.T., Gordon, D.B., Lee, T.I., Rinaldi, N.J., Macisaac, K.D., Danford, T.W., Hannett, N.M., Tagne, J.-B., Reynolds, D.B., Yoo, J. *et al.* (2004) Transcriptional regulatory code of a eukaryotic genome. *Nature*, **431**, Supplementary Table 2. doi: 10.1038/nature02800  
<http://www.ncbi.nlm.nih.gov/pmc/articles/PMC3006441/>
4. Harbison, C.T., Gordon, D.B., Lee, T.I., Rinaldi, N.J., Macisaac, K.D., Danford, T.W., Hannett, N.M., Tagne, J.-B., Reynolds, D.B., Yoo, J. *et al.* (2004) Transcriptional regulatory code of a eukaryotic genome. *Nature*, **431**, 99-104. doi: 10.1038/nature02800  
<http://www.ncbi.nlm.nih.gov/pmc/articles/PMC3006441/>
5. Yosefzon, Y., Koh, Y.Y., Chritton, J.J., Lande, A., Leibovich, L., Barziv, L., Petzold, C., Yakhini, Z., Mandel-Gutfreund, Y., Wickens, M. *et al.* (2011) Divergent RNA binding specificity of yeast Puf2p. *RNA*, **17**, 1479-1488. doi: 10.1261/rna.2700311 <http://www.ncbi.nlm.nih.gov/pmc/articles/PMC3153972/>
6. Gerber, A.P., Herschlag, D. and Brown, P.O. (2004) Extensive Association of Functionally and Cytotopically Related mRNAs with Puf Family RNA-Binding Proteins in Yeast. *PLoS Biol*, **2**, e79. doi: 10.1371/journal.pbio.0020079 <http://www.ncbi.nlm.nih.gov/pmc/articles/PMC368173/>
7. Hafner, M., Landthaler, M., Burger, L., Khorshid, M., Hausser, J., Berninger, P., Rothballer, A., Ascano Jr, M., Jungkamp, A.-C., Munschauer, M. *et al.* (2010) Transcriptome-wide Identification of RNA-Binding Protein and MicroRNA Target Sites by PAR-CLIP. *Cell*, **141**, 129-141. doi: 10.1016/j.cell.2010.03.009  
<http://www.ncbi.nlm.nih.gov/pmc/articles/PMC2861495/>
8. Hogan, D.J., Riordan, D.P., Gerber, A.P., Herschlag, D. and Brown, P.O. (2008) Diverse RNA-Binding Proteins Interact with Functionally Related Sets of RNAs, Suggesting an Extensive Regulatory System. *PLoS Biol*, **6**, e255. doi: 10.1371/journal.pbio.0060255 <http://www.ncbi.nlm.nih.gov/pmc/articles/PMC2573929/>
